# Supplementary material for: Use of Metabolomics as a Complementary Omic Approach to Implement Risk Criteria for First-Degree Relatives of Gastric Cancer Patients
Source: PubMed Central journal article supplement (PMC5877611; doi:10.3390/ijms19030750), 2018-03-07
Supplement: ijms-19-00750-s001.pdf [file ijms-19-00750-s001.pdf]

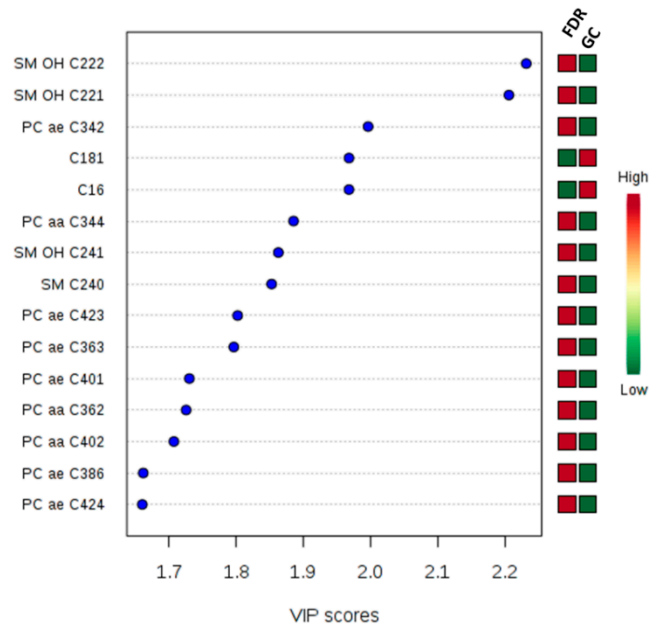

**Figure S1.** Variable importance in projection (VIP) score plot for the top 15 most important metabolite features identified by PLS-DA. The box indicate the relative concentration from GC and FDR groups.

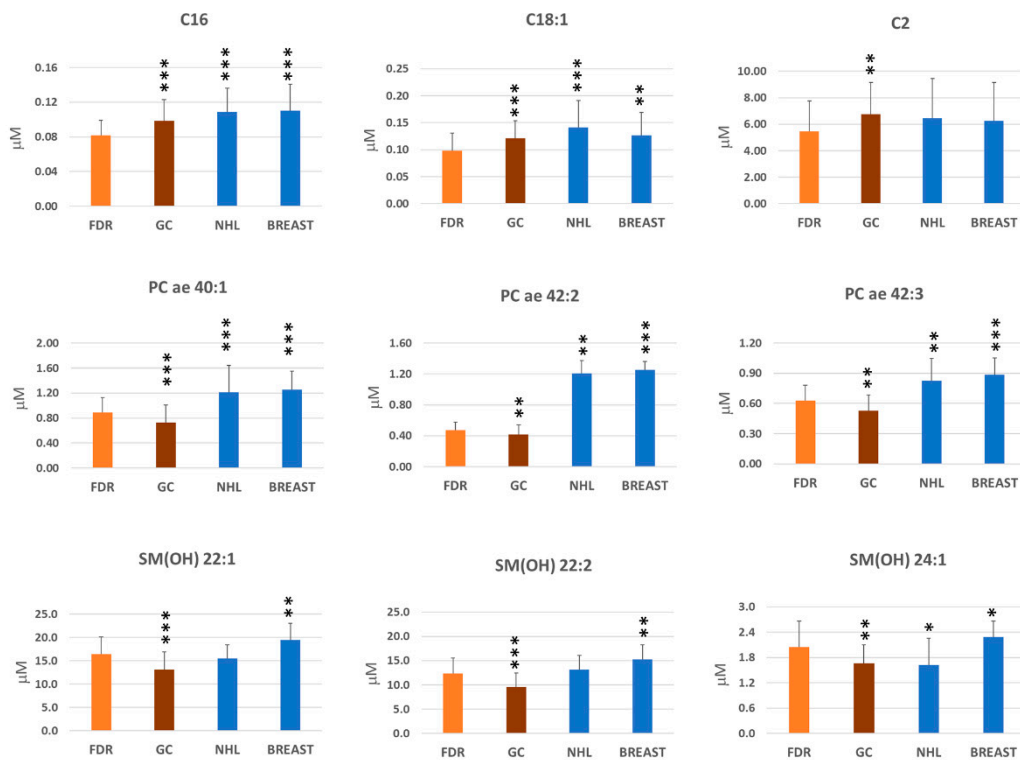

**Figure S2.** Comparison of metabolites serum concentrations between GC ( $n = 71$ ), NHL ( $n = 41$ ) and breast cancer ( $n = 34$ ) patients as compared with those observed in GC's FDR group ( $n = 54$ ). Value are expressed as mean  $\pm$ SD, Statistical significance: \*  $< 0.05$ , \*\*  $< 0.01$  and \*\*\*  $< 0.0001$  by  $t$ -text.

**Table S1.** List of metabolite determined using LC and FIA MS/MS platform

| Metabolite                                  | N  |                                                                                                                                                                                                                |                                                                                                                                                          |
|---------------------------------------------|----|----------------------------------------------------------------------------------------------------------------------------------------------------------------------------------------------------------------|----------------------------------------------------------------------------------------------------------------------------------------------------------|
| <i>Amino acids</i>                          | 21 | Ala,Arg,Asn,Asp,Cit,Gln,Glu,Gly,His,Ile,Leu,Lys,Met,Orn,Phe,Pro,Ser,Thr,Trp,Tyr,Val.                                                                                                                           | <i>Amino acid metabolism, urea-cycle, activity of gluconeogenesis and glycolysis, insulin sensitivity, neurotransmitter metabolism, oxidative stress</i> |
| <i>Biogenicamine</i>                        | 19 | ADMA, AcOrn, carnosine, creatinine, histamine, kynurenine, Met-SO ,Nitro-Tyr, OH-Pro,PEA,Putrescine,SDMA,sarcosine,serotonin,spermidine,spermine,taurine,alpha-AAA,totalDMA.                                   | <i>Neurological disorders, cell proliferation, cell cycle progression, DNA stability, oxidative stress</i>                                               |
| <i>Carnitine</i>                            | 1  | C0                                                                                                                                                                                                             | <i>Energy metabolism, fatty acid transport and mitochondrial fatty acid oxidation, ketosis, oxidative stress, mitochondrial membrane damage</i>          |
| <i>Acylcarnitines</i>                       | 26 | C2, C3, C3:1, C4, C4:1, C5, C5:1, C6 (or C4:1-DC), C6:1, C8, C8:1, C9, C10, C10:1, C10:2, C12, C12:1,C14, C14:1, C14:2, C16, C16:1, C16:2, C18, C18:1,C18:2.                                                   | “                                                                                                                                                        |
| <i>Hydroxy- and dicarboxyacylcarnitines</i> | 13 | C3-OH, C4-OH (or C3-DC), C5-DC (or C6-OH), C5-OH (or C3-DC-M), C5:1-DC, C5-M-DC, C7-DC, C12-DC, C14:1-OH, C14:2-OH, C16:1-OH, C16:2-OH, C16-OH, C18:1-OH.                                                      | “                                                                                                                                                        |
| <i>Sum of hexoses</i>                       | 1  | H1                                                                                                                                                                                                             | <i>Carbohydrate metabolism</i>                                                                                                                           |
| <i>Sphingomyelins</i>                       | 10 | SM 16:0, SM 16:1, SM 18:0, SM 18:1, SM 20:2, SM 22:3, SM 24:0, SM 24:1, SM 26:0, SM 26:1.                                                                                                                      | <i>Signalling cascades, membrane damage (eg,neurodegeneration)</i>                                                                                       |
| <i>Hydroxysphingomyelins</i>                | 5  | SM (OH) 14:1, SM (OH) 16:1, SM (OH) 22:1, SM(OH) 22:2, SM (OH) 24:1.                                                                                                                                           | “                                                                                                                                                        |
| <i>Diacyl-phosphatidylcholines</i>          | 38 | PC aa<br>24:0/26:0/28:1/30:0/30:2/32:0/32:1/32:2/32:3/34:1/34:2/34:3/34:4/36:0/36:1/36:2/36:3/36:4/C36:5/36:6/38:0/38:1/38:3/38:4/38:5/38:6/40:1/40:2/40:3/40:4/40:5/40:6/42:0/42:1/42:2/42:4/42:5/42:6.       | <i>Degradation of phospholipids, membrane damage, signalling cascades, fatty acid profile</i>                                                            |
| <i>Acyl-alkyl-phosphatidylcholines</i>      | 39 | PC ae<br>30:0/30:1/30:2/32:1/32:2/34:0/34:1/34:2/34:3/C36:0/C36:1/36:2/36:3/36:4/36:5/38:0/38:1/38:2/38:3/38:4/38:5/38:6/40:0/40:1/40:2/40:3/40:4/40:5/40:6/42:0/42:1/42:2/42:3/42:4/42:5/44:3/44:4/44:5/44:6. | “                                                                                                                                                        |
| <i>Lyso-phosphatidylcholines</i>            | 15 | lysoPC aa<br>6:0/14:0/16:0/16:1/17:0/18:0/18:1/18:2/20:3/20:4/24:0/26:0/26:1/28:0/28:1.                                                                                                                        | <i>Degradation of phospholipids (phospholipase activity), membrane damage, signalling cascades, fatty acid profiles</i>                                  |

aa, acyl-acyl; ae, acyl-alkyl; x:y, where x is the number of carbons in the fatty acid side chain; y is the number of double bonds in the fatty acid side chain; DC, decarboxyl; M,methyl; OH, hydroxyl; PC, phophatidylcholine; SM, sphingomyelin.

**Table S2.** List of metabolites differential expressed between FDR and GC patients in training set

| <i>N</i>  | <i>Metabolite*</i>  | <i>Variation **</i> | <i>t.stat</i>  | <i>p.value</i>  | <i>log.p</i>  | <i>q value-FDR</i> |
|-----------|---------------------|---------------------|----------------|-----------------|---------------|--------------------|
| 1         | C0                  | ↑                   | -2.5076        | 0.014082        | 1.8513        | 0.09               |
| 2         | C14                 | ↑                   | -2.499         | 0.0144          | 1.8416        | 0.09               |
| <b>3</b>  | <b>C16</b>          | ↑                   | <b>-3.4861</b> | <b>7.82E-04</b> | <b>3.1068</b> | <b>0.023458</b>    |
| <b>4</b>  | <b>C18:1</b>        | ↑                   | <b>-3.4862</b> | <b>7.82E-04</b> | <b>3.107</b>  | <b>0.023458</b>    |
| <b>5</b>  | <b>C2</b>           | ↑                   | <b>-2.3713</b> | <b>0.020016</b> | <b>1.6986</b> | <b>0.10723</b>     |
| 6         | C3                  | ↑                   | -2.3331        | 0.022033        | 1.6569        | 0.1135             |
| 7         | C5-OH C3-DC-M       | ↑                   | -2.674         | 0.009005        | 2.0455        | 0.070612           |
| 8         | Cit                 | ↑                   | -2.3107        | 0.023303        | 1.6326        | 0.1135             |
| 9         | Creatinine          | ↑                   | -2.2745        | 0.025488        | 1.5937        | 0.1135             |
| 10        | Ile                 | ↑                   | -2.0629        | 0.042212        | 1.3746        | 0.17113            |
| 11        | total DMA           | ↑                   | -1.9913        | 0.049703        | 1.3036        | 0.18639            |
| 12        | Thr                 | ↓                   | 2.4174         | 0.017797        | 1.7496        | 0.10291            |
| 13        | PC aa 32:2          | ↓                   | 2.667          | 0.009179        | 2.0372        | 0.070612           |
| 14        | PC aa 34:3          | ↓                   | 2.3745         | 0.01985         | 1.7022        | 0.10723            |
| 15        | PC aa 34:4          | ↓                   | 3.3202         | 0.001332        | 2.8754        | 0.030619           |
| 16        | PC aa 36:2          | ↓                   | 3.0067         | 0.003483        | 2.4581        | 0.043537           |
| 17        | PC aa 36:6          | ↓                   | 2.4165         | 0.017838        | 1.7487        | 0.10291            |
| 18        | PC aa 40:2          | ↓                   | 2.9715         | 0.003865        | 2.4129        | 0.044591           |
| 19        | PC aa 40:3          | ↓                   | 1.9976         | 0.048996        | 1.3098        | 0.18639            |
| 20        | PC aa 42:0          | ↓                   | 2.0485         | 0.04363         | 1.3602        | 0.17222            |
| 21        | PC aa 42:2          | ↓                   | 2.6227         | 0.010356        | 1.9848        | 0.070612           |
| 22        | PC aa 42:6          | ↓                   | 2.7928         | 0.006469        | 2.1892        | 0.05708            |
| 23        | PC ae 32:2          | ↓                   | 2.2707         | 0.025726        | 1.5896        | 0.1135             |
| 24        | PC ae 34:2          | ↓                   | 3.5441         | 6.46E-04        | 3.1895        | 0.023458           |
| 25        | PC ae 34:3          | ↓                   | 2.6496         | 0.009627        | 2.0165        | 0.070612           |
| 26        | PC ae 36:2          | ↓                   | 2.1312         | 0.035995        | 1.4438        | 0.14998            |
| 27        | PC ae 36:3          | ↓                   | 3.1446         | 0.002299        | 2.6384        | 0.034492           |
| 28        | PC ae 36:4          | ↓                   | 2.8437         | 0.005598        | 2.252         | 0.052481           |
| 29        | PC ae 38:0          | ↓                   | 2.3005         | 0.023901        | 1.6216        | 0.1135             |
| 30        | PC ae 38:6          | ↓                   | 2.8841         | 0.004985        | 2.3023        | 0.050255           |
| <b>31</b> | <b>PC ae 40:1</b>   | ↓                   | <b>3.0159</b>  | <b>0.003389</b> | <b>2.4699</b> | <b>0.043537</b>    |
| <b>32</b> | <b>PC ae 42:2</b>   | ↓                   | <b>2.2926</b>  | <b>0.024371</b> | <b>1.6131</b> | <b>0.1135</b>      |
| <b>33</b> | <b>PC ae 42:3</b>   | ↓                   | <b>3.1558</b>  | <b>0.002222</b> | <b>2.6532</b> | <b>0.034492</b>    |
| 34        | PC ae 42:4          | ↓                   | 2.8813         | 0.005026        | 2.2988        | 0.050255           |
| 35        | PC ae 44:6          | ↓                   | 2.1898         | 0.031311        | 1.5043        | 0.13419            |
| 36        | SM 16:1             | ↓                   | 2.6356         | 0.010001        | 2             | 0.070612           |
| 37        | SM 24:0             | ↓                   | 3.2555         | 0.001633        | 2.787         | 0.030619           |
| <b>38</b> | <b>SM (OH) 22:1</b> | ↓                   | <b>3.9828</b>  | <b>1.44E-04</b> | <b>3.8407</b> | <b>0.010822</b>    |
| <b>39</b> | <b>SM (OH) 22:2</b> | ↓                   | <b>4.0385</b>  | <b>1.18E-04</b> | <b>3.9266</b> | <b>0.010822</b>    |
| <b>40</b> | <b>SM (OH) 24:1</b> | ↓                   | <b>3.2752</b>  | <b>0.001535</b> | <b>2.8139</b> | <b>0.030619</b>    |

\*Criteria selection of the most significant metabolites  $p < 0.05$  and  $VIP \geq 1$ . \*\* Arrows indicate that the relative increase/ decrease of serum level in GC as compared to FDR group. In **bold** indicated the metabolites that have passed validation step.
